# Supplementary material for: Histological Transformation and Progression in Follicular Lymphoma: A Clonal Evolution Study
Source: PLoS Med. 2016 Dec 13;13(12):e1002197. doi: 10.1371/journal.pmed.1002197 (PMC5154502; doi:10.1371/journal.pmed.1002197)
Supplement: S2 Table — (XLSX) [file pmed.1002197.s023.xlsx]

## Sheet: wgs-capseq-samples-clinical
Sample information, pathological, and clinical annotation
PATIENT IDENTIFIER	CENTRE	T1 ID	T2 ID	COHORT	TYPE	PROGRESSER EARLY or LATE	NORMAL in CAPSEQ	T1 in CAPSEQ	T2 in CAPSEQ	T1 DATE	T1 GRADE	T1 ANN ARBOR STAGE	FLIPI	T2 DATE	T2 PATH	COO	TFL INITIAL TREATMENT PRE TRANSFORMATION	EARLY or LATE INITIAL TREATMENT POST FL
FL1001	BCCA	FL1001T1	FL1001T2	WGS and CAPSEQ	TFL	NO	YES	YES	YES	2003	GRADE 1 or 2	4	NA	2005	DLBC	GCB	OBSE	NA
FL1002	BCCA	FL1002T1	FL1002T2	CAPSEQ	TFL	NO	YES	YES	YES	2003	GRADE 1 or 2	3	NA	2004	DLBC	GCB	MULTI-AGENT	NA
FL1003	BCCA	FL1003T1	FL1003T2	CAPSEQ	TFL	EARLY	YES	YES	YES	2005	GRADE 3A	3	HIGH	2006	DLBC	GCB	MULTI-AGENT-RITU	R-CVP-R-MAINTENANCE
FL1004	BCCA	FL1004T1	FL1004T2	WGS and CAPSEQ	TFL	NO	YES	YES	YES	1998	GRADE 1 or 2	4	HIGH	2001	DLBC	GCB	SINGLE-AGENT	NA
FL1005	BCCA	FL1005T1	FL1005T2	WGS and CAPSEQ	TFL	NO	YES	YES	YES	2007	GRADE 3A	2	LOW/INTERMEDIATE	2009	DLBC	ABC	OBSE	NA
FL1006	BCCA	FL1006T1	FL1006T2	WGS and CAPSEQ	TFL	NO	YES	YES	YES	2000	GRADE 1 or 2	3	NA	2008	DLBC	GCB	OBSE	NA
FL1007	BCCA	FL1007T1	FL1007T2	WGS and CAPSEQ	TFL	NO	YES	YES	YES	1996	GRADE 1 or 2	3	NA	2011	BCLU	NA	OBSE	NA
FL1008	BCCA	FL1008T1	FL1008T2	WGS and CAPSEQ	TFL	NO	YES	YES	YES	2002	GRADE 1 or 2	4	LOW/INTERMEDIATE	2003	DLBC	GCB	SINGLE-AGENT	NA
FL1009	BCCA	FL1009T1	FL1009T2	WGS and CAPSEQ	TFL	NO	YES	YES	YES	2003	GRADE 1 or 2	4	LOW/INTERMEDIATE	2004	COM	NA	OBSE	NA
FL1010	BCCA	FL1010T1	FL1010T2	CAPSEQ	TFL	NO	YES	YES	YES	1999	GRADE 1 or 2	2	NA	2000	DLBC	GCB	SINGLE-AGENT	NA
FL1011	BCCA	FL1011T1	FL1011T2	CAPSEQ	TFL	NO	YES	YES	YES	2000	GRADE 1 or 2	4	LOW/INTERMEDIATE	2004	COM	NA	OBSE	NA
FL1012	BCCA	FL1012T1	FL1012T2	WGS and CAPSEQ	TFL	NO	YES	YES	YES	2006	GRADE 3A	3	HIGH	2006	DLBC	ABC	OBSE	NA
FL1013	BCCA	FL1013T1	FL1013T2	WGS and CAPSEQ	TFL	EARLY	YES	YES	YES	2007	GRADE 3A	4	LOW/INTERMEDIATE	2008	DLBC	GCB	MULTI-AGENT-RITU	R-CVP-R-MAINTENANCE
FL1014	BCCA	FL1014T1	FL1014T2	WGS and CAPSEQ	TFL	NO	YES	YES	YES	2004	GRADE 1 or 2	3	NA	2004	COM	NA	OBSE	NA
FL1016	BCCA	FL1016T1	FL1016T2	WGS and CAPSEQ	TFL	NO	YES	YES	YES	2010	GRADE 1 or 2	3	NA	2013	DLBC	GCB	MULTI-AGENT-RITU	NA
FL1017	BCCA	FL1017T1	FL1017T2	WGS and CAPSEQ	TFL	NO	YES	YES	YES	2013	GRADE 1 or 2	3	LOW/INTERMEDIATE	2013	DLBC	GCB	OTHER	NA
FL1018	BCCA	FL1018T1	FL1018T2	WGS and CAPSEQ	TFL	NO	YES	YES	YES	2009	GRADE 1 or 2	1	LOW/INTERMEDIATE	2011	DLBC	GCB	RAD_SURG	NA
FL1019	BCCA	FL1019T1	FL1019T2	WGS and CAPSEQ	TFL	NO	YES	YES	YES	2009	GRADE 1 or 2	2	LOW/INTERMEDIATE	2014	DLBC	GCB	OBSE	NA
FL1020	BCCA	FL1020T1	FL1020T2	WGS and CAPSEQ	TFL	NO	YES	YES	YES	2009	GRADE 3A	3	NA	2010	DLBC	GCB	OBSE	NA
FL1101	BCCA	FL1101T1	FL1101T2	CAPSEQ	TFL	NO	NA	YES	YES	2004	GRADE 1 or 2	3	HIGH	2008	DLBC	ABC	OBSE	NA
FL1102	BCCA	FL1102T1	FL1102T2	CAPSEQ	TFL	NO	NA	YES	YES	1999	GRADE 1 or 2	3	NA	2003	DLBC	GCB	OBSE	NA
FL1103	BCCA	FL1103T1	FL1103T2	CAPSEQ	TFL	NO	NA	YES	YES	1998	GRADE 1 or 2	NA	NA	1998	DLBC	GCB	UNKN	NA
FL1104	BCCA	FL1104T1	FL1104T2	CAPSEQ	TFL	NO	NA	YES	YES	2007	GRADE 1 or 2	3	HIGH	2008	DLBC	GCB	OBSE	NA
FL1105	BCCA	FL1105T1	FL1105T2	CAPSEQ	TFL	NO	YES	YES	YES	2009	GRADE 1 or 2	3	HIGH	2014	DLBC	GCB	OBSE	NA
FL1106	BCCA	FL1106T1	FL1106T2	CAPSEQ	TFL	NO	NA	YES	YES	1997	GRADE 1 or 2	4	NA	1999	DLBC	GCB	MULTI-AGENT	NA
FL1107	BCCA	NA	FL1107T2	CAPSEQ	TFL	NO	NA	NA	YES	1993	GRADE 1 or 2	1	NA	1996	DLBC	GCB	SINGLE-AGENT	NA
FL1108	BCCA	FL1108T1	FL1108T2	CAPSEQ	TFL	NO	NA	YES	YES	2002	GRADE 1 or 2	2	NA	2004	BCLU	NA	SINGLE-AGENT	NA
FL1109	BCCA	FL1109T1	FL1109T2	CAPSEQ	TFL	NO	YES	YES	YES	2002	GRADE 1 or 2	4	HIGH	2005	DLBC	GCB	SINGLE-AGENT	NA
FL1110	BCCA	FL1110T1	FL1110T2	CAPSEQ	TFL	NO	YES	YES	YES	2000	GRADE 1 or 2	4	NA	2004	DLBC	GCB	OBSE	NA
FL1111	BCCA	FL1111T1	FL1111T2	CAPSEQ	TFL	NO	NA	YES	YES	1998	GRADE 1 or 2	1	LOW/INTERMEDIATE	2001	DLBC	GCB	RAD_SURG	NA
FL1112	BCCA	FL1112T1	FL1112T2	CAPSEQ	TFL	NO	NA	YES	YES	2001	GRADE 1 or 2	4	HIGH	2008	DLBC	GCB	OBSE	NA
FL1114	BCCA	FL1114T1	FL1114T2	CAPSEQ	TFL	NO	YES	YES	YES	2003	GRADE 3A	3	LOW/INTERMEDIATE	2004	DLBC	UNCLASSIFIED	SINGLE-AGENT	NA
FL1115	BCCA	FL1115T1	FL1115T2	CAPSEQ	TFL	NO	YES	YES	YES	2000	GRADE 1 or 2	3	NA	2004	DLBC	GCB	OBSE	NA
FL1116	BCCA	FL1116T1	FL1116T2	CAPSEQ	TFL	NO	NA	YES	YES	1996	GRADE 1 or 2	4	LOW/INTERMEDIATE	1997	DLBC	GCB	MULTI-AGENT	NA
FL1117	BCCA	FL1117T1	FL1117T2	CAPSEQ	TFL	NO	YES	YES	YES	2004	GRADE 1 or 2	3	LOW/INTERMEDIATE	2009	DLBC	GCB	OBSE	NA
FL1118	BCCA	FL1118T1	FL1118T2	CAPSEQ	TFL	NO	YES	YES	YES	2001	GRADE 1 or 2	2	LOW/INTERMEDIATE	2003	DLBC	GCB	OBSE	NA
FL1119	BCCA	FL1119T1	FL1119T2	CAPSEQ	TFL	NO	NA	YES	YES	1995	GRADE 1 or 2	3	NA	2001	DLBC	GCB	SINGLE-AGENT	NA
FL1120	BCCA	FL1120T1	FL1120T2	CAPSEQ	TFL	NO	NA	YES	YES	2008	GRADE 1 or 2	NA	NA	2012	DLBC	GCB	UNKN	NA
FL1122	BCCA	FL1122T1	FL1122T2	CAPSEQ	TFL	NO	NA	YES	YES	1998	GRADE 1 or 2	4	NA	1999	DLBC	GCB	SINGLE-AGENT	NA
FL1123	BCCA	FL1123T1	FL1123T2	CAPSEQ	TFL	NO	YES	YES	YES	1999	GRADE 1 or 2	2	LOW/INTERMEDIATE	2005	BCLU	NA	RAD_SURG	NA
FL1124	BCCA	FL1124T1	FL1124T2	CAPSEQ	TFL	NO	NA	YES	YES	1998	GRADE 1 or 2	1	LOW/INTERMEDIATE	2005	DLBC	GCB	RAD_SURG	NA
FL1125	BCCA	FL1125T1	NA	CAPSEQ	TFL	NO	NA	YES	NA	1992	GRADE 1 or 2	4	NA	1997	DLBC	GCB	MULTI-AGENT	NA
FL1127	BCCA	FL1127T1	FL1127T2	CAPSEQ	TFL	NO	NA	YES	YES	1993	GRADE 1 or 2	4	NA	1995	DLBC	GCB	OBSE	NA
FL1128	BCCA	FL1128T1	FL1128T2	CAPSEQ	TFL	NO	NA	YES	YES	2003	GRADE 1 or 2	2	LOW/INTERMEDIATE	2012	BCLU	NA	OBSE	NA
FL1129	BCCA	FL1129T1	FL1129T2	CAPSEQ	TFL	NO	NA	YES	YES	2004	GRADE 1 or 2	4	LOW/INTERMEDIATE	2004	BCLU	NA	SINGLE-AGENT	NA
FL1130	BCCA	FL1130T1	FL1130T2	CAPSEQ	TFL	NO	YES	YES	YES	2003	GRADE 1 or 2	3	NA	2004	DLBC	GCB	OBSE	NA
FL1131	BCCA	FL1131T1	FL1131T2	CAPSEQ	TFL	NO	NA	YES	YES	2006	GRADE 1 or 2	3	NA	2008	DLBC	ABC	OBSE	NA
FL1132	BCCA	FL1132T1	FL1132T2	CAPSEQ	TFL	NO	NA	YES	YES	2003	GRADE 1 or 2	3	LOW/INTERMEDIATE	2006	DLBC	GCB	OBSE	NA
FL1133	BCCA	NA	FL1133T2	CAPSEQ	TFL	NO	NA	NA	YES	1998	GRADE 1 or 2	4	NA	2011	DLBC	GCB	OBSE	NA
FL1134	BCCA	FL1134T1	FL1134T2	CAPSEQ	TFL	NO	NA	YES	YES	2011	GRADE 1 or 2	3	NA	2012	DLBC	GCB	RAD_SURG	NA
FL1135	BCCA	FL1135T1	FL1135T2	CAPSEQ	TFL	NO	NA	YES	YES	2000	GRADE 1 or 2	4	NA	2000	DLBC	GCB	SINGLE-AGENT	NA
FL1136	BCCA	FL1136T1	FL1136T2	CAPSEQ	TFL	NO	NA	YES	YES	2006	GRADE 1 or 2	4	HIGH	2008	DLBC	GCB	OBSE	NA
FL1137	BCCA	FL1137T1	FL1137T2	CAPSEQ	TFL	NO	NA	YES	YES	1998	GRADE 1 or 2	1	LOW/INTERMEDIATE	2002	COM	NA	MULTI-AGENT	NA
FL1138	BCCA	FL1138T1	FL1138T2	CAPSEQ	TFL	NO	YES	YES	YES	1999	GRADE 1 or 2	4	LOW/INTERMEDIATE	2009	DLBC	GCB	SINGLE-AGENT	NA
FL1139	BCCA	FL1139T1	FL1139T2	CAPSEQ	TFL	NO	NA	YES	YES	1997	GRADE 1 or 2	4	NA	1997	BCLU	NA	MULTI-AGENT	NA
FL1140	BCCA	FL1140T1	FL1140T2	CAPSEQ	TFL	NO	YES	YES	YES	2000	GRADE 1 or 2	1	LOW/INTERMEDIATE	2007	DLBC	ABC	RAD_SURG	NA
FL1141	BCCA	FL1141T1	FL1141T2	CAPSEQ	TFL	NO	NA	YES	YES	2012	GRADE 1 or 2	2	NA	2012	DLBC	GCB	RAD_SURG	NA
FL1142	BCCA	FL1142T1	FL1142T2	CAPSEQ	TFL	NO	NA	YES	YES	1999	GRADE 1 or 2	4	NA	2009	DLBC	GCB	MULTI-AGENT	NA
FL1143	BCCA	FL1143T1	FL1143T2	CAPSEQ	TFL	NO	NA	YES	YES	1995	GRADE 1 or 2	4	HIGH	2002	DLBC	GCB	MULTI-AGENT	NA
FL1144	BCCA	NA	FL1144T2	CAPSEQ	TFL	NO	YES	NA	YES	2002	GRADE 1 or 2	3	LOW/INTERMEDIATE	2006	DLBC	GCB	SINGLE-AGENT	NA
FL1145	BCCA	FL1145T1	FL1145T2	CAPSEQ	TFL	NO	NA	YES	YES	2001	GRADE 1 or 2	1	NA	2001	BCLU	NA	RAD_SURG	NA
FL1146	BCCA	FL1146T1	FL1146T2	CAPSEQ	TFL	NO	NA	YES	YES	2002	GRADE 1 or 2	3	NA	2005	DLBC	GCB	OBSE	NA
FL1147	BCCA	FL1147T1	FL1147T2	CAPSEQ	TFL	NO	NA	YES	YES	1993	GRADE 1 or 2	4	NA	1998	DLBC	UNCLASSIFIED	UNKN	NA
FL1148	BCCA	FL1148T1	FL1148T2	CAPSEQ	TFL	NO	YES	YES	YES	1995	GRADE 1 or 2	3	NA	1996	DLBC	GCB	MULTI-AGENT	NA
FL1149	BCCA	FL1149T1	FL1149T2	CAPSEQ	TFL	NO	NA	YES	YES	1998	GRADE 3A	4	NA	2004	DLBC	ABC	SINGLE-AGENT	NA
FL1150	BCCA	FL1150T1	FL1150T2	CAPSEQ	TFL	NO	NA	YES	YES	1999	GRADE 1 or 2	4	HIGH	2004	DLBC	GCB	OBSE	NA
FL1151	BCCA	FL1151T1	FL1151T2	CAPSEQ	TFL	NO	NA	YES	YES	2003	GRADE 1 or 2	2	LOW/INTERMEDIATE	2011	DLBC	GCB	RAD_SURG	NA
FL1152	BCCA	FL1152T1	FL1152T2	CAPSEQ	TFL	NO	NA	YES	YES	2003	GRADE 1 or 2	3	HIGH	2004	DLBC	GCB	OBSE	NA
FL1153	BCCA	FL1153T1	FL1153T2	CAPSEQ	TFL	NO	YES	YES	YES	1997	GRADE 1 or 2	4	NA	2005	DLBC	GCB	MULTI-AGENT	NA
FL1155	BCCA	FL1155T1	FL1155T2	CAPSEQ	TFL	NO	NA	YES	YES	1998	GRADE 1 or 2	2	LOW/INTERMEDIATE	2004	DLBC	GCB	SINGLE-AGENT	NA
FL1157	BCCA	NA	FL1157T2	CAPSEQ	TFL	NO	YES	NA	YES	2000	GRADE 1 or 2	3	LOW/INTERMEDIATE	2010	DLBC	GCB	OBSE	NA
FL1158	BCCA	NA	FL1158T2	CAPSEQ	TFL	NO	NA	NA	YES	1980	GRADE 1 or 2	NA	NA	1995	DLBC	GCB	UNKN	NA
FL1160	BCCA	FL1160T1	FL1160T2	CAPSEQ	TFL	NO	NA	YES	YES	2005	GRADE 1 or 2	4	LOW/INTERMEDIATE	2009	DLBC	GCB	MULTI-AGENT-RITU	NA
FL1161	BCCA	FL1161T1	FL1161T2	CAPSEQ	TFL	NO	YES	YES	YES	2007	GRADE 3A	4	LOW/INTERMEDIATE	2012	DLBC	ABC	MULTI-AGENT-RITU	NA
FL1162	BCCA	FL1162T1	FL1162T2	CAPSEQ	TFL	NO	NA	YES	YES	1991	GRADE 1 or 2	4	NA	2001	DLBC	ABC	OBSE	NA
FL1163	BCCA	NA	FL1163T2	CAPSEQ	TFL	NO	NA	NA	YES	2003	GRADE 1 or 2	3	NA	2004	DLBC	GCB	OBSE	NA
FL1165	BCCA	NA	FL1165T2	CAPSEQ	TFL	NO	NA	NA	YES	1989	GRADE 1 or 2	4	NA	2000	DLBC	UNCLASSIFIED	OBSE	NA
FL1166	BCCA	NA	FL1166T2	CAPSEQ	TFL	NO	NA	NA	YES	1983	GRADE 1 or 2	4	NA	2006	DLBC	GCB	SINGLE-AGENT	NA
FL1167	BCCA	NA	FL1167T2	CAPSEQ	TFL	NO	NA	NA	YES	2001	GRADE 3A	1	LOW/INTERMEDIATE	2002	COM	NA	RAD_SURG	NA
FL1169	BCCA	FL1169T1	NA	CAPSEQ	TFL	EARLY	NA	YES	NA	2008	GRADE 1 or 2	3	LOW/INTERMEDIATE	NA	DLBC	NA	MULTI-AGENT-RITU	R-CVP-R-MAINTENANCE
FL1170	BCCA	FL1170T1	FL1170T2	CAPSEQ	TFL	NO	NA	YES	YES	1994	GRADE 1 or 2	4	NA	NA	DLBC	NA	MULTI-AGENT	NA
FL1174	BCCA	FL1174T1	NA	CAPSEQ	TFL	NO	NA	YES	NA	1994	GRADE 1 or 2	1	NA	NA	DLBC	NA	RAD_SURG	NA
FL1175	BCCA	FL1175T1	FL1175T2	CAPSEQ	TFL	NO	NA	YES	YES	1993	GRADE 1 or 2	3	NA	2001	DLBC	NA	OBSE	NA
FL1176	BCCA	NA	FL1176T2	CAPSEQ	TFL	NO	YES	NA	YES	2000	GRADE 1 or 2	3	LOW/INTERMEDIATE	2003	COM	NA	OBSE	NA
FL1177	BCCA	NA	FL1177T2	CAPSEQ	TFL	NO	NA	NA	YES	1990	GRADE 1 or 2	4	NA	2003	COM	NA	MULTI-AGENT	NA
FL1178	BCCA	FL1178T1	FL1178T2	CAPSEQ	TFL	NO	YES	YES	YES	2000	GRADE 1 or 2	3	NA	2006	DLBC	GCB	MULTI-AGENT	NA
FL1179	BCCA	FL1179T1	FL1179T2	CAPSEQ	TFL	NO	YES	YES	YES	2005	GRADE 1 or 2	3	LOW/INTERMEDIATE	2011	DLBC	GCB	MULTI-AGENT-RITU	NA
FL1180	BCCA	FL1180T1	NA	CAPSEQ	TFL	NO	NA	YES	NA	1998	GRADE 1 or 2	4	NA	NA	DLBC	NA	OBSE	NA
FL1181	BCCA	NA	FL1181T2	CAPSEQ	TFL	NO	NA	NA	YES	1991	GRADE 1 or 2	3	NA	2000	DLBC	GCB	SINGLE-AGENT	NA
FL1183	BCCA	NA	FL1183T2	CAPSEQ	TFL	NO	NA	NA	YES	1987	GRADE 1 or 2	3	NA	1999	DLBC	GCB	OBSE	NA
FL1185	BCCA	NA	FL1185T2	CAPSEQ	TFL	NO	NA	NA	YES	1970	GRADE 1 or 2	NA	NA	2001	COM	NA	RAD_SURG	NA
FL1186	BCCA	NA	FL1186T2	CAPSEQ	TFL	NO	NA	NA	YES	1992	GRADE 1 or 2	NA	NA	2002	DLBC	GCB	OBSE	NA
FL1187	BCCA	FL1187T1	FL1187T2	CAPSEQ	TFL	NO	NA	YES	YES	2008	GRADE 1 or 2	4	LOW/INTERMEDIATE	2011	DLBC	GCB	MULTI-AGENT-RITU	NA
FL1188	BCCA	FL1188T1	FL1188T2	CAPSEQ	TFL	NO	NA	YES	YES	2006	GRADE 3A	4	HIGH	2007	DLBC	ABC	OTHER	NA
FL1189	BCCA	FL1189T1	FL1189T2	CAPSEQ	TFL	NO	YES	YES	YES	2000	GRADE 1 or 2	3	NA	2002	DLBC	GCB	SINGLE-AGENT	NA
FL1190	BCCA	FL1190T1	FL1190T2	CAPSEQ	TFL	EARLY	NA	YES	YES	2008	GRADE 3A	3	HIGH	2010	DLBC	GCB	MULTI-AGENT-RITU	R-CVP-R-MAINTENANCE
FL1192	BCCA	FL1192T1	FL1192T2	CAPSEQ	TFL	NO	NA	YES	YES	1997	GRADE 1 or 2	4	NA	2009	DLBC	GCB	SINGLE-AGENT	NA
FL1193	BCCA	FL1193T1	FL1193T2	CAPSEQ	TFL	EARLY	NA	YES	YES	2009	GRADE 1 or 2	3	LOW/INTERMEDIATE	2013	DLBC	ABC	MULTI-AGENT-RITU	R-CVP-R-MAINTENANCE
FL1194	BCCA	FL1194T1	FL1194T2	CAPSEQ	TFL	NO	NA	YES	YES	2009	GRADE 1 or 2	3	HIGH	2011	DLBC	GCB	OBSE	NA
FL1195	BCCA	FL1195T1	FL1195T2	CAPSEQ	TFL	NO	NA	YES	YES	2001	GRADE 1 or 2	3	LOW/INTERMEDIATE	NA	DLBC	GCB	MULTI-AGENT	NA
FL1196	BCCA	FL1196T1	FL1196T2	CAPSEQ	TFL	NO	NA	YES	YES	1995	GRADE 1 or 2	4	NA	1997	DLBC	ABC	SINGLE-AGENT	NA
FL1197	BCCA	FL1197T1	FL1197T2	CAPSEQ	TFL	NO	NA	YES	YES	2010	GRADE 3A	4	HIGH	2012	DLBC	ABC	MULTI-AGENT-RITU	NA
FL1198	BCCA	FL1198T1	FL1198T2	CAPSEQ	TFL	NO	NA	YES	YES	2005	GRADE 3A	3	LOW/INTERMEDIATE	2007	DLBC	GCB	OBSE	NA
FL1199	BCCA	NA	FL1199T2	CAPSEQ	TFL	NO	NA	NA	YES	1991	GRADE 1 or 2	4	NA	1992	BCLU	NA	MULTI-AGENT	NA
FL1201	BCCA	NA	FL1201T2	CAPSEQ	TFL	NO	NA	NA	YES	1998	GRADE 1 or 2	3	NA	1999	COM	NA	MULTI-AGENT	NA
FL1202	BCCA	FL1202T1	FL1202T2	CAPSEQ	TFL	EARLY	NA	YES	YES	2007	GRADE 3A	2	LOW/INTERMEDIATE	2008	DLBC	GCB	MULTI-AGENT-RITU	OTHER R-CHEMO
FL1203	BCCA	NA	FL1203T2	CAPSEQ	TFL	NO	YES	NA	YES	2002	GRADE 1 or 2	4	HIGH	2005	COM	NA	OBSE	NA
FL1204	BCCA	NA	FL1204T2	CAPSEQ	TFL	NO	YES	NA	YES	1994	GRADE 1 or 2	4	NA	2003	DLBC	GCB	MULTI-AGENT	NA
FL1205	BCCA	NA	FL1205T2	CAPSEQ	TFL	NO	NA	NA	YES	1998	GRADE 1 or 2	NA	NA	2000	DLBC	GCB	UNKN	NA
FL1206	BCCA	FL1206T1	NA	CAPSEQ	TFL	NO	NA	YES	NA	1998	GRADE 1 or 2	1	NA	NA	DLBC	NA	RAD_SURG	NA
FL1207	BCCA	NA	FL1207T2	CAPSEQ	TFL	NO	NA	NA	YES	1991	GRADE 1 or 2	2	LOW/INTERMEDIATE	2001	DLBC	GCB	MULTI-AGENT	NA
FL1208	BCCA	NA	FL1208T2	CAPSEQ	TFL	NO	NA	NA	YES	1998	GRADE 1 or 2	4	NA	2006	DLBC	GCB	SINGLE-AGENT	NA
FL1211	BCCA	FL1211T1	FL1211T2	CAPSEQ	TFL	NO	NA	YES	YES	1989	GRADE 1 or 2	NA	NA	2000	DLBC	GCB	UNKN	NA
FL1212	BCCA	FL1212T1	FL1212T2	CAPSEQ	TFL	NO	NA	YES	YES	2006	GRADE 1 or 2	1	LOW/INTERMEDIATE	2009	DLBC	GCB	OBSE	NA
FL1213	BCCA	FL1213T1	NA	CAPSEQ	TFL	NO	NA	YES	NA	1991	GRADE 1 or 2	3	LOW/INTERMEDIATE	NA	DLBC	NA	SINGLE-AGENT	NA
FL1215	BCCA	FL1215T1	NA	CAPSEQ	TFL	NO	NA	YES	NA	2009	GRADE 3A	2	LOW/INTERMEDIATE	2012	COM	NA	RAD_SURG	NA
FL1216	BCCA	FL1216T1	FL1216T2	CAPSEQ	TFL	NO	YES	YES	YES	2001	GRADE 3A	1	LOW/INTERMEDIATE	2004	COM	NA	OBSE	NA
FL1217	BCCA	FL1217T1	FL1217T2	CAPSEQ	TFL	NO	NA	YES	YES	2001	GRADE 1 or 2	3	NA	2006	COM	NA	MULTI-AGENT	NA
FL1218	BCCA	FL1218T1	FL1218T2	CAPSEQ	TFL	NO	NA	YES	YES	2009	GRADE 1 or 2	3	HIGH	2011	COM	NA	OBSE	NA
FL1219	BCCA	FL1219T1	FL1219T2	CAPSEQ	TFL	NO	YES	YES	YES	2002	GRADE 1 or 2	4	LOW/INTERMEDIATE	2003	DLBC	GCB	OBSE	NA
FL1220	BCCA	FL1220T1	FL1220T2	CAPSEQ	TFL	NO	NA	YES	YES	2010	GRADE 3A	1	LOW/INTERMEDIATE	2014	DLBC	GCB	RAD_SURG	NA
FL1221	BCCA	FL1221T1	FL1221T2	CAPSEQ	TFL	NO	YES	YES	YES	2001	GRADE 1 or 2	4	NA	2010	DLBC	GCB	OTHER	NA
FL1222	BCCA	FL1222T1	FL1222T2	CAPSEQ	TFL	NO	NA	YES	YES	2003	GRADE 1 or 2	2	LOW/INTERMEDIATE	2011	DLBC	ABC	RAD_SURG	NA
FL1223	BCCA	FL1223T1	FL1223T2	CAPSEQ	TFL	NO	NA	YES	YES	1990	GRADE 1 or 2	4	NA	2003	COM	NA	MULTI-AGENT	NA
FL1224	BCCA	NA	FL1224T2	CAPSEQ	TFL	NO	NA	NA	YES	1986	GRADE 1 or 2	3	NA	NA	BCLU	NA	UNKN	NA
FL1225	BCCA	FL1225T1	FL1225T2	CAPSEQ	TFL	NO	NA	YES	YES	1985	GRADE 1 or 2	4	LOW/INTERMEDIATE	1987	DLBC	GCB	SINGLE-AGENT	NA
FL1226	BCCA	NA	FL1226T2	CAPSEQ	TFL	NO	NA	NA	YES	1995	GRADE 1 or 2	4	NA	1998	DLBC	GCB	SINGLE-AGENT	NA
FL1227	BCCA	NA	FL1227T2	CAPSEQ	TFL	NO	NA	NA	YES	1994	GRADE 1 or 2	4	NA	1995	DLBC	ABC	SINGLE-AGENT	NA
FL1229	BCCA	NA	FL1229T2	CAPSEQ	TFL	NO	NA	NA	YES	1987	GRADE 1 or 2	4	HIGH	1997	DLBC	NA	OBSE	NA
FL1230	BCCA	FL1230T1	FL1230T2	CAPSEQ	TFL	NO	NA	YES	YES	2004	GRADE 1 or 2	3	NA	2006	COM	NA	MULTI-AGENT-RITU	NA
FL1231	BCCA	FL1231T1	FL1231T2	CAPSEQ	TFL	NO	NA	YES	YES	2008	GRADE 1 or 2	2	LOW/INTERMEDIATE	2012	COM	NA	OBSE	NA
FL1233	BCCA	FL1233T1	FL1233T2	CAPSEQ	TFL	NO	YES	YES	YES	2000	GRADE 1 or 2	3	NA	2002	COM	NA	SINGLE-AGENT	NA
FL1234	BCCA	FL1234T1	FL1234T2	CAPSEQ	TFL	NO	NA	YES	YES	2009	GRADE 3A	3	LOW/INTERMEDIATE	2012	DLBC	GCB	OBSE	NA
FL1235	BCCA	FL1235T1	FL1235T2	CAPSEQ	TFL	NO	YES	YES	YES	2007	GRADE 1 or 2	3	LOW/INTERMEDIATE	2013	COM	NA	MULTI-AGENT-RITU	NA
FL1236	BCCA	FL1236T1	FL1236T2	CAPSEQ	TFL	NO	NA	YES	YES	2002	GRADE 1 or 2	2	LOW/INTERMEDIATE	2005	DLBC	GCB	OBSE	NA
FL1237	BCCA	FL1237T1	NA	CAPSEQ	TFL	NO	NA	YES	NA	1998	GRADE 1 or 2	NA	NA	1998	DLBC	GCB	UNKN	NA
FL1238	BCCA	FL1238T1	NA	CAPSEQ	TFL	NO	NA	YES	NA	1997	GRADE 3A	3	LOW/INTERMEDIATE	1999	DLBC	GCB	MULTI-AGENT	NA
FL1239	BCCA	NA	FL1239T2	CAPSEQ	TFL	NO	NA	NA	YES	1992	GRADE 1 or 2	4	NA	2011	DLBC	ABC	MULTI-AGENT	NA
FL1240	BCCA	FL1240T1	FL1240T2	CAPSEQ	TFL	NO	NA	YES	YES	1993	GRADE 1 or 2	3	NA	1994	DLBC	GCB	OBSE	NA
FL1241	BCCA	FL1241T1	FL1241T2	CAPSEQ	TFL	NO	NA	YES	YES	2000	GRADE 1 or 2	4	NA	2004	BCLU	NA	OBSE	NA
FL1242	BCCA	NA	FL1242T2	CAPSEQ	TFL	NO	NA	NA	YES	1999	GRADE 1 or 2	3	NA	2001	DLBC	ABC	SINGLE-AGENT	NA
FL1245	BCCA	FL1245T1	FL1245T2	CAPSEQ	TFL	NO	YES	YES	YES	2005	GRADE 3A	1	LOW/INTERMEDIATE	2006	COM	NA	RAD_SURG	NA
FL1246	BCCA	FL1246T1	FL1246T2	CAPSEQ	TFL	NO	YES	YES	YES	2004	GRADE 1 or 2	3	HIGH	2009	DLBC	GCB	SINGLE-AGENT	NA
FL1247	BCCA	NA	FL1247T2	CAPSEQ	TFL	NO	NA	NA	YES	1998	GRADE 1 or 2	4	HIGH	2001	COM	NA	RAD_SURG	NA
FL1248	BCCA	FL1248T1	FL1248T2	CAPSEQ	TFL	NO	NA	YES	YES	1998	GRADE 1 or 2	1	LOW/INTERMEDIATE	2004	COM	NA	RAD_SURG	NA
FL1249	BCCA	FL1249T1	FL1249T2	CAPSEQ	TFL	NO	NA	YES	YES	2005	GRADE 1 or 2	4	LOW/INTERMEDIATE	2014	DLBC	GCB	MULTI-AGENT-RITU	NA
FL1250	BCCA	FL1250T1	FL1250T2	CAPSEQ	TFL	NO	NA	YES	YES	2011	GRADE 3A	4	LOW/INTERMEDIATE	2015	DLBC	GCB	OBSE	NA
FL1251	BCCA	FL1251T1	NA	CAPSEQ	TFL	NO	NA	YES	NA	2013	GRADE 1 or 2	4	HIGH	2014	DLBC	NA	OTHER	NA
FL1252	BCCA	NA	FL1252T2	CAPSEQ	TFL	NO	NA	NA	YES	2000	GRADE 1 or 2	1	LOW/INTERMEDIATE	2015	DLBC	GCB	RAD_SURG	OTHER
FL1253	BCCA	NA	FL1253T2	CAPSEQ	TFL	NO	NA	NA	YES	2013	GRADE 3A	4	HIGH	2014	DLBC	ABC	MULTI-AGENT-RITU	NA
FL1254	BCCA	FL1254T1	FL1254T2	CAPSEQ	TFL	LATE	NA	YES	YES	2008	GRADE 1 or 2	2	LOW/INTERMEDIATE	2014	COM	NA	OBSE	OBSE
FL1255	BCCA	FL1255T1	FL1255T2	CAPSEQ	TFL	NO	NA	YES	YES	2001	GRADE 1 or 2	4	NA	2007	DLBC	NA	MULTI-AGENT	NA
FL1256	BCCA	FL1256T1	FL1256T2	CAPSEQ	TFL	NO	NA	YES	YES	2012	GRADE 1 or 2	4	LOW/INTERMEDIATE	2014	COM	NA	OTHER	NA
FL1257	BCCA	FL1257T1	FL1257T2	CAPSEQ	TFL	NO	NA	YES	YES	2006	GRADE 3A	1	LOW/INTERMEDIATE	2012	COM	NA	OBSE	NA
FL1258	LEUVEN	FL1258T1	FL1258T2	CAPSEQ	TFL	NO	NA	YES	YES	1999	NA	NA	NA	2000	DLBC	GCB	UNKN	NA
FL1259	LEUVEN	FL1259T1	FL1259T2	CAPSEQ	TFL	NO	NA	YES	YES	1998	GRADE 3A	NA	NA	2000	DLBC	GCB	MULTI-AGENT	NA
FL1260	MAYO	FL1260T1	FL1260T2	CAPSEQ	TFL	NO	NA	YES	YES	1990	NA	NA	NA	1996	DLBC	ABC	UNKN	NA
FL1261	MAYO	FL1261T1	FL1261T2	CAPSEQ	TFL	NO	NA	YES	YES	1995	NA	NA	NA	1999	DLBC	GCB	UNKN	NA
FL1262	MAYO	FL1262T1	FL1262T2	CAPSEQ	TFL	NO	NA	YES	YES	2000	NA	NA	NA	2002	DLBC	GCB	UNKN	NA
FL2001	BCCA	FL2001T1	FL2001T2	WGS	PFL	NO	NA	NA	NA	2002	GRADE 1 or 2	3	LOW/INTERMEDIATE	2006	FOLL2	NA	NA	NA
FL2002	BCCA	FL2002T1	FL2002T2	WGS and CAPSEQ	PFL	EARLY	YES	YES	NA	2007	GRADE 1 or 2	4	HIGH	2008	FOLL2	NA	NA	R-CVP-R-MAINTENANCE
FL2003	BCCA	FL2003T1	FL2003T2	CAPSEQ	PFL	EARLY	YES	YES	NA	2006	GRADE 1 or 2	2	LOW/INTERMEDIATE	2006	FOLL1	NA	NA	R-CVP-R-MAINTENANCE
FL2004	BCCA	FL2004T1	FL2004T2	CAPSEQ	PFL	EARLY	NA	YES	NA	2006	GRADE 1 or 2	4	LOW/INTERMEDIATE	2008	FOLL2	NA	NA	R-CVP-R-MAINTENANCE
FL2005	BCCA	FL2005T1	FL2005T2	WGS and CAPSEQ	PFL	EARLY	YES	YES	NA	2007	GRADE 3A	4	LOW/INTERMEDIATE	2008	FOLL3A	NA	NA	OTHER R-CHEMO
FL2006	BCCA	FL2006T1	FL2006T2	WGS and CAPSEQ	PFL	EARLY	NA	YES	NA	2005	GRADE 1 or 2	4	LOW/INTERMEDIATE	2008	FOLL1	NA	NA	R-CVP-R-MAINTENANCE
FL2007	BCCA	FL2007T1	FL2007T2	WGS and CAPSEQ	PFL	EARLY	NA	YES	NA	2007	GRADE 1 or 2	4	HIGH	2008	FOLL2	NA	NA	OTHER R-CHEMO
FL2008	BCCA	FL2008T1	FL2008T2	WGS and CAPSEQ	PFL	EARLY	YES	YES	NA	2012	GRADE 1 or 2	4	HIGH	2014	FOLL1	NA	NA	R-CVP-R-MAINTENANCE
FL2101	BCCA	FL2101T1	NA	CAPSEQ	PFL	EARLY	NA	YES	NA	2009	GRADE 1 or 2	2	HIGH	NA	NA	NA	NA	R-CVP-R-MAINTENANCE
FL2102	BCCA	FL2102T1	NA	CAPSEQ	PFL	EARLY	NA	YES	NA	2011	GRADE 1 or 2	4	HIGH	NA	NA	NA	NA	R-CVP-R-MAINTENANCE
FL2103	BCCA	FL2103T1	NA	CAPSEQ	PFL	EARLY	NA	YES	NA	2009	GRADE 1 or 2	4	HIGH	NA	NA	NA	NA	R-CVP-R-MAINTENANCE
FL2104	BCCA	FL2104T1	NA	CAPSEQ	PFL	EARLY	NA	YES	NA	2010	GRADE 3A	4	LOW/INTERMEDIATE	NA	NA	NA	NA	R-CVP-R-MAINTENANCE
FL2105	BCCA	FL2105T1	NA	CAPSEQ	PFL	EARLY	NA	YES	NA	2010	GRADE 1 or 2	3	LOW/INTERMEDIATE	NA	NA	NA	NA	R-CVP-R-MAINTENANCE
FL2106	BCCA	FL2106T1	NA	CAPSEQ	PFL	EARLY	NA	YES	NA	2010	GRADE 1 or 2	4	HIGH	NA	NA	NA	NA	R-CVP-R-MAINTENANCE
FL2107	BCCA	FL2107T1	NA	CAPSEQ	PFL	EARLY	NA	YES	NA	2008	GRADE 1 or 2	4	LOW/INTERMEDIATE	NA	NA	NA	NA	OTHER R-CHEMO
FL2108	BCCA	FL2108T1	NA	CAPSEQ	PFL	EARLY	NA	YES	NA	2010	GRADE 1 or 2	4	HIGH	NA	NA	NA	NA	R-CVP-R-MAINTENANCE
FL2109	BCCA	FL2109T1	NA	CAPSEQ	PFL	EARLY	NA	YES	NA	2010	GRADE 1 or 2	2	LOW/INTERMEDIATE	NA	NA	NA	NA	R-CVP-R-MAINTENANCE
FL2110	BCCA	FL2110T1	NA	CAPSEQ	PFL	EARLY	NA	YES	NA	2009	GRADE 1 or 2	4	HIGH	NA	NA	NA	NA	R-CVP-R-MAINTENANCE
FL2111	BCCA	FL2111T1	NA	CAPSEQ	PFL	EARLY	NA	YES	NA	2008	GRADE 1 or 2	4	HIGH	NA	NA	NA	NA	R-CVP-R-MAINTENANCE
FL2112	BCCA	FL2112T1	NA	CAPSEQ	PFL	EARLY	NA	YES	NA	2004	GRADE 1 or 2	3	HIGH	NA	NA	NA	NA	OTHER R-CHEMO
FL2113	BCCA	FL2113T1	NA	CAPSEQ	PFL	EARLY	NA	YES	NA	2006	GRADE 1 or 2	3	HIGH	NA	NA	NA	NA	R-CVP-R-MAINTENANCE
FL2114	BCCA	FL2114T1	NA	CAPSEQ	PFL	EARLY	NA	YES	NA	2007	GRADE 3A	4	HIGH	NA	NA	NA	NA	R-CVP-R-MAINTENANCE
FL2115	BCCA	FL2115T1	NA	CAPSEQ	PFL	EARLY	NA	YES	NA	2012	GRADE 3A	4	HIGH	NA	NA	NA	NA	R-CVP-R-MAINTENANCE
FL2116	BCCA	FL2116T1	NA	CAPSEQ	PFL	EARLY	NA	YES	NA	2007	GRADE 1 or 2	4	HIGH	NA	NA	NA	NA	R-CVP-R-MAINTENANCE
FL2117	BCCA	FL2117T1	NA	CAPSEQ	PFL	EARLY	YES	YES	NA	2009	GRADE 3A	4	HIGH	NA	NA	NA	NA	R-CVP-R-MAINTENANCE
FL2118	BCCA	FL2118T1	NA	CAPSEQ	PFL	EARLY	NA	YES	NA	2008	GRADE 1 or 2	4	HIGH	NA	NA	NA	NA	OTHER R-CHEMO
FL2119	BCCA	FL2119T1	NA	CAPSEQ	PFL	EARLY	NA	YES	NA	2007	GRADE 1 or 2	4	LOW/INTERMEDIATE	NA	NA	NA	NA	OTHER R-CHEMO
FL2120	BCCA	FL2120T1	NA	CAPSEQ	PFL	EARLY	NA	YES	NA	2009	GRADE 1 or 2	3	HIGH	NA	NA	NA	NA	OTHER R-CHEMO
FL2121	BCCA	FL2121T1	NA	CAPSEQ	PFL	EARLY	NA	YES	NA	2011	GRADE 3A	3	HIGH	NA	NA	NA	NA	R-CVP-R-MAINTENANCE
FL2122	BCCA	FL2122T1	NA	CAPSEQ	PFL	EARLY	NA	YES	NA	2012	GRADE 3A	1	LOW/INTERMEDIATE	NA	NA	NA	NA	R-CVP-R-MAINTENANCE
FL2123	BCCA	FL2123T1	NA	CAPSEQ	PFL	EARLY	NA	YES	NA	2008	GRADE 3A	3	HIGH	NA	NA	NA	NA	R-CVP-R-MAINTENANCE
FL2124	BCCA	FL2124T1	NA	CAPSEQ	PFL	EARLY	NA	YES	NA	2005	GRADE 1 or 2	4	LOW/INTERMEDIATE	NA	NA	NA	NA	R-CVP-R-MAINTENANCE
FL2125	BCCA	FL2125T1	NA	CAPSEQ	PFL	EARLY	YES	YES	NA	2011	GRADE 1 or 2	4	HIGH	NA	NA	NA	NA	R-CVP-R-MAINTENANCE
FL2126	BCCA	FL2126T1	NA	CAPSEQ	PFL	EARLY	NA	YES	NA	2011	GRADE 1 or 2	3	HIGH	NA	NA	NA	NA	R-CVP-R-MAINTENANCE
FL2127	BCCA	FL2127T1	NA	CAPSEQ	PFL	EARLY	NA	YES	NA	2008	GRADE 1 or 2	4	NA	NA	NA	NA	NA	R-CVP-R-MAINTENANCE
FL2128	BCCA	FL2128T1	NA	CAPSEQ	PFL	EARLY	NA	YES	NA	2010	GRADE 1 or 2	4	HIGH	NA	NA	NA	NA	R-CVP-R-MAINTENANCE
FL3001	BCCA	FL3001T1	NA	WGS and CAPSEQ	NPFL	LATE	YES	YES	NA	2003	GRADE 1 or 2	4	LOW/INTERMEDIATE	NA	NA	NA	NA	OBSE
FL3002	BCCA	FL3002T1	NA	WGS	NPFL	NO	NA	NA	NA	1996	GRADE 1 or 2	4	NA	NA	NA	NA	NA	NA
FL3003	BCCA	FL3003T1	NA	WGS and CAPSEQ	NPFL	LATE	YES	YES	NA	2004	GRADE 1 or 2	3	LOW/INTERMEDIATE	NA	NA	NA	NA	R-CVP-R-MAINTENANCE
FL3004	BCCA	FL3004T1	NA	WGS and CAPSEQ	NPFL	LATE	YES	YES	NA	2003	GRADE 1 or 2	4	LOW/INTERMEDIATE	NA	NA	NA	NA	OBSE
FL3005	BCCA	FL3005T1	NA	WGS and CAPSEQ	NPFL	LATE	YES	YES	NA	2004	GRADE 1 or 2	4	LOW/INTERMEDIATE	NA	NA	NA	NA	OBSE
FL3006	BCCA	FL3006T1	NA	WGS	NPFL	LATE	NA	NA	NA	1997	GRADE 1 or 2	4	LOW/INTERMEDIATE	NA	NA	NA	NA	OBSE
FL3007	BCCA	FL3007T1	NA	WGS and CAPSEQ	NPFL	LATE	YES	YES	NA	2004	GRADE 1 or 2	4	HIGH	NA	NA	NA	NA	R-CVP-R-MAINTENANCE
FL3008	BCCA	FL3008T1	NA	WGS and CAPSEQ	NPFL	LATE	YES	YES	NA	2004	GRADE 1 or 2	3	LOW/INTERMEDIATE	NA	NA	NA	NA	R-CVP-R-MAINTENANCE
FL3009	BCCA	FL3009T1	NA	WGS and CAPSEQ	NPFL	LATE	NA	YES	NA	2001	GRADE 1 or 2	1	LOW/INTERMEDIATE	NA	NA	NA	NA	OTHER
FL3010	BCCA	FL3010T1	NA	WGS and CAPSEQ	NPFL	LATE	NA	YES	NA	1999	GRADE 1 or 2	4	LOW/INTERMEDIATE	NA	NA	NA	NA	OBSE
FL3011	BCCA	FL3011T1	NA	WGS and CAPSEQ	NPFL	LATE	NA	YES	NA	2001	GRADE 1 or 2	1	LOW/INTERMEDIATE	NA	NA	NA	NA	OBSE
FL3012	BCCA	FL3012T1	NA	WGS and CAPSEQ	NPFL	LATE	YES	YES	NA	2003	GRADE 1 or 2	3	LOW/INTERMEDIATE	NA	NA	NA	NA	OBSE
FL3013	BCCA	FL3013T1	NA	WGS and CAPSEQ	NPFL	LATE	YES	YES	NA	2007	GRADE 1 or 2	3	HIGH	NA	NA	NA	NA	OBSE
FL3014	BCCA	FL3014T1	NA	WGS and CAPSEQ	NPFL	LATE	YES	YES	NA	2001	GRADE 1 or 2	4	LOW/INTERMEDIATE	NA	NA	NA	NA	OBSE
FL3015	BCCA	FL3015T1	NA	WGS and CAPSEQ	NPFL	LATE	NA	YES	NA	2006	GRADE 1 or 2	3	LOW/INTERMEDIATE	NA	NA	NA	NA	R-CVP-R-MAINTENANCE
FL3016	BCCA	FL3016T1	NA	WGS and CAPSEQ	NPFL	LATE	YES	YES	NA	2006	GRADE 1 or 2	4	HIGH	NA	NA	NA	NA	R-CVP-R-MAINTENANCE
FL3017	BCCA	FL3017T1	NA	WGS and CAPSEQ	NPFL	LATE	YES	YES	NA	2007	GRADE 1 or 2	4	HIGH	NA	NA	NA	NA	R-CVP-R-MAINTENANCE
FL3018	BCCA	FL3018T1	NA	WGS and CAPSEQ	NPFL	LATE	YES	YES	NA	2005	GRADE 1 or 2	4	LOW/INTERMEDIATE	NA	NA	NA	NA	OBSE
FL3019	BCCA	FL3019T1	NA	WGS and CAPSEQ	NPFL	LATE	NA	YES	NA	2006	GRADE 1 or 2	3	LOW/INTERMEDIATE	NA	NA	NA	NA	OBSE
FL3020	BCCA	FL3020T1	NA	WGS and CAPSEQ	NPFL	LATE	YES	YES	NA	2006	GRADE 1 or 2	3	HIGH	NA	NA	NA	NA	R-CVP-R-MAINTENANCE
FL3101	BCCA	FL3101T1	NA	CAPSEQ	NPFL	LATE	NA	YES	NA	2004	GRADE 1 or 2	4	NA	NA	NA	NA	NA	R-CVP-R-MAINTENANCE
FL3102	BCCA	FL3102T1	NA	CAPSEQ	NPFL	LATE	NA	YES	NA	2006	GRADE 1 or 2	4	LOW/INTERMEDIATE	NA	NA	NA	NA	OBSE
FL3103	BCCA	FL3103T1	NA	CAPSEQ	NPFL	LATE	YES	YES	NA	2008	GRADE 1 or 2	3	LOW/INTERMEDIATE	NA	NA	NA	NA	OBSE
FL3104	BCCA	FL3104T1	NA	CAPSEQ	NPFL	LATE	NA	YES	NA	2009	GRADE 1 or 2	1	LOW/INTERMEDIATE	NA	NA	NA	NA	OTHER
FL3105	BCCA	FL3105T1	NA	CAPSEQ	NPFL	LATE	NA	YES	NA	2004	GRADE 1 or 2	3	LOW/INTERMEDIATE	NA	NA	NA	NA	R-CVP-R-MAINTENANCE
FL3106	BCCA	FL3106T1	NA	CAPSEQ	NPFL	LATE	NA	YES	NA	2007	GRADE 1 or 2	3	LOW/INTERMEDIATE	NA	NA	NA	NA	R-CVP-R-MAINTENANCE
FL3108	BCCA	FL3108T1	NA	CAPSEQ	NPFL	LATE	NA	YES	NA	2006	GRADE 1 or 2	3	LOW/INTERMEDIATE	NA	NA	NA	NA	OBSE
FL3109	BCCA	FL3109T1	NA	CAPSEQ	NPFL	LATE	NA	YES	NA	2007	GRADE 1 or 2	2	LOW/INTERMEDIATE	NA	NA	NA	NA	OBSE
FL3110	BCCA	FL3110T1	NA	CAPSEQ	NPFL	LATE	NA	YES	NA	2006	GRADE 1 or 2	2	LOW/INTERMEDIATE	NA	NA	NA	NA	OBSE
FL3111	BCCA	FL3111T1	NA	CAPSEQ	NPFL	LATE	NA	YES	NA	2008	GRADE 1 or 2	4	HIGH	NA	NA	NA	NA	R-CVP-R-MAINTENANCE
FL3112	BCCA	FL3112T1	NA	CAPSEQ	NPFL	LATE	NA	YES	NA	2008	GRADE 1 or 2	3	LOW/INTERMEDIATE	NA	NA	NA	NA	R-CVP-R-MAINTENANCE
FL3113	BCCA	FL3113T1	NA	CAPSEQ	NPFL	LATE	YES	YES	NA	2007	GRADE 1 or 2	4	LOW/INTERMEDIATE	NA	NA	NA	NA	OBSE
FL3114	BCCA	FL3114T1	NA	CAPSEQ	NPFL	LATE	NA	YES	NA	2005	GRADE 1 or 2	2	LOW/INTERMEDIATE	NA	NA	NA	NA	OBSE
FL3115	BCCA	FL3115T1	NA	CAPSEQ	NPFL	LATE	NA	YES	NA	2007	GRADE 1 or 2	2	LOW/INTERMEDIATE	NA	NA	NA	NA	OBSE
FL3116	BCCA	FL3116T1	NA	CAPSEQ	NPFL	LATE	NA	YES	NA	2005	GRADE 1 or 2	4	LOW/INTERMEDIATE	NA	NA	NA	NA	OBSE
FL3117	BCCA	FL3117T1	NA	CAPSEQ	NPFL	LATE	YES	YES	NA	2005	GRADE 1 or 2	4	LOW/INTERMEDIATE	NA	NA	NA	NA	R-CVP-R-MAINTENANCE
FL3118	BCCA	FL3118T1	NA	CAPSEQ	NPFL	LATE	YES	YES	NA	2006	GRADE 3A	1	LOW/INTERMEDIATE	NA	NA	NA	NA	R-CVP-R-MAINTENANCE
FL3119	BCCA	FL3119T1	NA	CAPSEQ	NPFL	LATE	NA	YES	NA	2006	GRADE 1 or 2	4	HIGH	NA	NA	NA	NA	R-CVP-R-MAINTENANCE
FL3120	BCCA	FL3120T1	NA	CAPSEQ	NPFL	LATE	NA	YES	NA	2005	GRADE 1 or 2	4	LOW/INTERMEDIATE	NA	NA	NA	NA	R-CVP-R-MAINTENANCE
FL3121	BCCA	FL3121T1	NA	CAPSEQ	NPFL	LATE	NA	YES	NA	2006	GRADE 3A	3	LOW/INTERMEDIATE	NA	NA	NA	NA	R-CVP-R-MAINTENANCE
FL3122	BCCA	FL3122T1	NA	CAPSEQ	NPFL	LATE	NA	YES	NA	2006	GRADE 1 or 2	4	LOW/INTERMEDIATE	NA	NA	NA	NA	R-CVP-R-MAINTENANCE
FL3123	BCCA	FL3123T1	NA	CAPSEQ	NPFL	LATE	YES	YES	NA	2007	GRADE 1 or 2	3	LOW/INTERMEDIATE	NA	NA	NA	NA	R-CVP-R-MAINTENANCE
FL3124	BCCA	FL3124T1	NA	CAPSEQ	NPFL	LATE	NA	YES	NA	2006	GRADE 1 or 2	4	HIGH	NA	NA	NA	NA	R-CVP-R-MAINTENANCE
FL3125	BCCA	FL3125T1	NA	CAPSEQ	NPFL	LATE	NA	YES	NA	2006	GRADE 1 or 2	4	HIGH	NA	NA	NA	NA	R-CVP-R-MAINTENANCE
FL3126	BCCA	FL3126T1	NA	CAPSEQ	NPFL	LATE	NA	YES	NA	2004	GRADE 1 or 2	1	LOW/INTERMEDIATE	NA	NA	NA	NA	OBSE
FL3127	BCCA	FL3127T1	NA	CAPSEQ	NPFL	LATE	NA	YES	NA	2008	GRADE 1 or 2	2	LOW/INTERMEDIATE	NA	NA	NA	NA	R-CVP-R-MAINTENANCE
FL3128	BCCA	FL3128T1	NA	CAPSEQ	NPFL	LATE	NA	YES	NA	2005	GRADE 3A	3	HIGH	NA	NA	NA	NA	R-CVP-R-MAINTENANCE
FL3130	BCCA	FL3130T1	NA	CAPSEQ	NPFL	LATE	NA	YES	NA	2008	GRADE 1 or 2	3	LOW/INTERMEDIATE	NA	NA	NA	NA	R-CVP-R-MAINTENANCE
FL3131	BCCA	FL3131T1	NA	CAPSEQ	NPFL	LATE	YES	YES	NA	2006	GRADE 1 or 2	3	LOW/INTERMEDIATE	NA	NA	NA	NA	R-CVP-R-MAINTENANCE
FL3132	BCCA	FL3132T1	NA	CAPSEQ	NPFL	LATE	YES	YES	NA	2006	GRADE 1 or 2	3	HIGH	NA	NA	NA	NA	R-CVP-R-MAINTENANCE
FL3134	BCCA	FL3134T1	NA	CAPSEQ	NPFL	LATE	NA	YES	NA	2005	GRADE 1 or 2	4	LOW/INTERMEDIATE	NA	NA	NA	NA	R-CVP-R-MAINTENANCE
FL3135	BCCA	FL3135T1	NA	CAPSEQ	NPFL	LATE	NA	YES	NA	2006	GRADE 1 or 2	4	HIGH	NA	NA	NA	NA	R-CVP-R-MAINTENANCE
FL3137	BCCA	FL3137T1	NA	CAPSEQ	NPFL	LATE	YES	YES	NA	2006	GRADE 1 or 2	2	LOW/INTERMEDIATE	NA	NA	NA	NA	R-CVP-R-MAINTENANCE
FL3138	BCCA	FL3138T1	NA	CAPSEQ	NPFL	LATE	NA	YES	NA	2006	GRADE 1 or 2	2	LOW/INTERMEDIATE	NA	NA	NA	NA	R-CVP-R-MAINTENANCE
FL3139	BCCA	FL3139T1	NA	CAPSEQ	NPFL	LATE	NA	YES	NA	2006	GRADE 3A	4	HIGH	NA	NA	NA	NA	R-CVP-R-MAINTENANCE
FL3140	BCCA	FL3140T1	NA	CAPSEQ	NPFL	LATE	NA	YES	NA	2006	GRADE 1 or 2	4	LOW/INTERMEDIATE	NA	NA	NA	NA	R-CVP-R-MAINTENANCE
FL3141	BCCA	FL3141T1	NA	CAPSEQ	NPFL	LATE	YES	YES	NA	2006	GRADE 1 or 2	3	HIGH	NA	NA	NA	NA	R-CVP-R-MAINTENANCE
FL3142	BCCA	FL3142T1	NA	CAPSEQ	NPFL	LATE	NA	YES	NA	2005	GRADE 1 or 2	3	HIGH	NA	NA	NA	NA	OBSE
FL3144	BCCA	FL3144T1	NA	CAPSEQ	NPFL	LATE	NA	YES	NA	2006	GRADE 1 or 2	3	LOW/INTERMEDIATE	NA	NA	NA	NA	OBSE
FL3145	BCCA	FL3145T1	NA	CAPSEQ	NPFL	LATE	YES	YES	NA	2005	GRADE 3A	1	LOW/INTERMEDIATE	NA	NA	NA	NA	OBSE
FL3146	BCCA	FL3146T1	NA	CAPSEQ	NPFL	LATE	NA	YES	NA	2006	GRADE 1 or 2	4	LOW/INTERMEDIATE	NA	NA	NA	NA	OBSE
FL3147	BCCA	FL3147T1	NA	CAPSEQ	NPFL	LATE	YES	YES	NA	2008	GRADE 1 or 2	3	LOW/INTERMEDIATE	NA	NA	NA	NA	OBSE
FL3148	BCCA	FL3148T1	NA	CAPSEQ	NPFL	LATE	NA	YES	NA	2006	GRADE 1 or 2	3	LOW/INTERMEDIATE	NA	NA	NA	NA	R-CVP-R-MAINTENANCE
FL3149	BCCA	FL3149T1	NA	CAPSEQ	NPFL	LATE	NA	YES	NA	2006	GRADE 1 or 2	1	LOW/INTERMEDIATE	NA	NA	NA	NA	OBSE
FL3150	BCCA	FL3150T1	NA	CAPSEQ	NPFL	LATE	NA	YES	NA	2008	GRADE 3A	4	HIGH	NA	NA	NA	NA	R-CVP-R-MAINTENANCE
FL3151	BCCA	FL3151T1	NA	CAPSEQ	NPFL	LATE	NA	YES	NA	2006	GRADE 1 or 2	4	HIGH	NA	NA	NA	NA	R-CVP-R-MAINTENANCE
FL3152	BCCA	FL3152T1	NA	CAPSEQ	NPFL	LATE	NA	YES	NA	2006	GRADE 1 or 2	3	LOW/INTERMEDIATE	NA	NA	NA	NA	R-CVP-R-MAINTENANCE
FL3153	BCCA	FL3153T1	NA	CAPSEQ	NPFL	LATE	NA	YES	NA	2005	GRADE 3A	3	LOW/INTERMEDIATE	NA	NA	NA	NA	R-CVP-R-MAINTENANCE
FL3154	BCCA	FL3154T1	NA	CAPSEQ	NPFL	LATE	YES	YES	NA	2005	GRADE 1 or 2	4	HIGH	NA	NA	NA	NA	R-CVP-R-MAINTENANCE
FL3155	BCCA	FL3155T1	NA	CAPSEQ	NPFL	LATE	YES	YES	NA	2005	GRADE 1 or 2	2	LOW/INTERMEDIATE	NA	NA	NA	NA	OBSE
FL3156	BCCA	FL3156T1	NA	CAPSEQ	NPFL	LATE	NA	YES	NA	2007	GRADE 1 or 2	2	LOW/INTERMEDIATE	NA	NA	NA	NA	R-CVP-R-MAINTENANCE
FL3157	BCCA	FL3157T1	NA	CAPSEQ	NPFL	LATE	NA	YES	NA	2006	GRADE 1 or 2	3	LOW/INTERMEDIATE	NA	NA	NA	NA	OBSE
FL3159	BCCA	FL3159T1	NA	CAPSEQ	NPFL	LATE	NA	YES	NA	2004	GRADE 1 or 2	4	LOW/INTERMEDIATE	NA	NA	NA	NA	OBSE
FL3160	BCCA	FL3160T1	NA	CAPSEQ	NPFL	LATE	NA	YES	NA	2007	GRADE 1 or 2	4	LOW/INTERMEDIATE	NA	NA	NA	NA	OTHER R-CHEMO
FL3161	BCCA	FL3161T1	NA	CAPSEQ	NPFL	LATE	NA	YES	NA	2007	GRADE 1 or 2	4	HIGH	NA	NA	NA	NA	R-CVP-R-MAINTENANCE
FL3162	BCCA	FL3162T1	NA	CAPSEQ	NPFL	LATE	NA	YES	NA	2008	GRADE 1 or 2	4	LOW/INTERMEDIATE	NA	NA	NA	NA	OBSE
FL3163	BCCA	FL3163T1	NA	CAPSEQ	NPFL	LATE	NA	YES	NA	2007	GRADE 1 or 2	4	HIGH	NA	NA	NA	NA	R-CVP-R-MAINTENANCE
FL3164	BCCA	FL3164T1	NA	CAPSEQ	NPFL	LATE	NA	YES	NA	2006	GRADE 1 or 2	1	LOW/INTERMEDIATE	NA	NA	NA	NA	OBSE
FL3165	BCCA	FL3165T1	NA	CAPSEQ	NPFL	LATE	NA	YES	NA	2006	GRADE 1 or 2	2	LOW/INTERMEDIATE	NA	NA	NA	NA	OBSE
FL3166	BCCA	FL3166T1	NA	CAPSEQ	NPFL	LATE	NA	YES	NA	2007	GRADE 1 or 2	2	LOW/INTERMEDIATE	NA	NA	NA	NA	R-CVP-R-MAINTENANCE
FL3167	BCCA	FL3167T1	NA	CAPSEQ	NPFL	LATE	NA	YES	NA	2000	GRADE 1 or 2	2	LOW/INTERMEDIATE	NA	NA	NA	NA	OBSE
FL3168	BCCA	FL3168T1	NA	CAPSEQ	NPFL	LATE	NA	YES	NA	2007	GRADE 1 or 2	3	LOW/INTERMEDIATE	NA	NA	NA	NA	OBSE
FL3169	BCCA	FL3169T1	NA	CAPSEQ	NPFL	LATE	NA	YES	NA	2004	GRADE 1 or 2	4	NA	NA	NA	NA	NA	R-CVP-R-MAINTENANCE
FL3170	BCCA	FL3170T1	NA	CAPSEQ	NPFL	LATE	NA	YES	NA	2007	GRADE 1 or 2	3	LOW/INTERMEDIATE	NA	NA	NA	NA	OBSE
FL3171	BCCA	FL3171T1	NA	CAPSEQ	NPFL	LATE	NA	YES	NA	2006	GRADE 1 or 2	3	LOW/INTERMEDIATE	NA	NA	NA	NA	OBSE
