# Supplementary material for: Histological Transformation and Progression in Follicular Lymphoma: A Clonal Evolution Study
Source: PLoS Med. 2016 Dec 13;13(12):e1002197. doi: 10.1371/journal.pmed.1002197 (PMC5154502; doi:10.1371/journal.pmed.1002197)
Supplement: S3 Table — States from TITAN are collapsed in one of ten different summary states listed in the state summary column for analysis. (XLSX) [file pmed.1002197.s024.xlsx]

## Sheet: Sheet1
TITAN copy number state overview
State No.	State	Genotype	State Summary	Copy Number	Major	Minor
0	HOMD	NA	Homozygous Deletion	0	0	0
1	DLOH	A	Hemizygous Deletion	1	1	0
		B
2	NLOH	AA	Somatic LOH	2	2	0
		BB
3	HET	AB	Neutral	2	1	1
4	ALOH	AAA	Somatic LOH	3	3	0
		BBB
5	GAIN	AAB	3N Gain	3	2	1
		ABB
6	ALOH	AAAA	Somatic LOH	4	4	0
		BBBB
7	ASCNA	AAAB	4N Gain	4	3	1
		ABBB
8	BCNA	AABB	4N Gain	4	2	2
9	ALOH	AAAAA	Somatic LOH	5	5	0
		BBBBB
10	ASCNA	AAAAB	5N Gain	5	4	1
		ABBBB
11	UBCNA	AAABB	5N Gain	5	3	2
		AABBB
12	ALOH	AAAAAA	Somatic LOH	6	6	0
		BBBBBB
13	ASCNA	AAAAAB	6N Gain	6	5	1
		ABBBBB
14	UBCNA	AAAABB	6N Gain	6	4	2
		AABBBB
15	BCNA	AAABBB	6N Gain	6	3	3
16	ALOH	AAAAAAA	Somatic LOH	7	7	0
		BBBBBBB
17	ASCNA	AAAAAAB	7N Gain	7	6	1
		ABBBBBB
18	UBCNA	AAAAABB	7N Gain	7	5	2
		AABBBBB
19	UBCNA	AAAABBB	7N Gain	7	4	3
		AAABBBB
20	ALOH	AAAAAAAA	Somatic LOH	8	8	0
		BBBBBBBB
21	ASCNA	AAAAAAAB	8N Gain	8	7	1
		ABBBBBBB
22	UBCNA	AAAAAABB	8N Gain	8	6	2
		AABBBBBB
23	UBCNA	AAAAABBB	8N Gain	8	5	3
		AAABBBBB
24	BCNA	AAAABBBB	8N Gain	8	4	4
