# Supplementary material for: Histological Transformation and Progression in Follicular Lymphoma: A Clonal Evolution Study
Source: PLoS Med. 2016 Dec 13;13(12):e1002197. doi: 10.1371/journal.pmed.1002197 (PMC5154502; doi:10.1371/journal.pmed.1002197)
Supplement: S7 Table — (XLSX) [file pmed.1002197.s028.xlsx]

## Sheet: titan.selected.params.df
TITAN final selected parameters
sampleID	numClusters	normInit	ploidyInit	normal_contam_est	ploidy	S_Dbw_validity_index	logLikelihood	patientName	timepoint
FL1001T1_FL1001N	2	0	2	0	2.01	0.3285	-4.20193e+06	FL1001	T1
FL1001T2_FL1001N	2	0.58	2	0.58	2.05	0.2573	-4.51339e+06	FL1001	T2
FL1004T1_FL1004N	2	0.32	2	0.32	2.06	0.1457	-4.09452e+06	FL1004	T1
FL1004T2_FL1004N	1	0.27	2	0.27	2.07	0.1027	-4.30214e+06	FL1004	T2
FL1005T1_FL1005N	2	0.14	2	0.14	2.02	0.1456	-4.08612e+06	FL1005	T1
FL1005T2_FL1005N	3	0.01	2	0.01	1.96	0.1542	-4.3067e+06	FL1005	T2
FL1006T1_FL1006N	1	0.41	2	0.41	2.07	0.2435	-4.96477e+06	FL1006	T1
FL1006T2_FL1006N	1	0.06	2	0.06	1.97	0.1394	-5.03276e+06	FL1006	T2
FL1007T1_FL1007N	2	0.06	2	0.06	1.99	0.2104	-5.38384e+06	FL1007	T1
FL1007T2_FL1007N	1	0.12	2	0.12	2.08	0.1877	-5.88378e+06	FL1007	T2
FL1008T1_FL1008N	2	0.29	2	0.29	2.01	0.2083	-4.59836e+06	FL1008	T1
FL1008T2_FL1008N	1	0.19	2	0.19	2.06	0.1902	-5.55982e+06	FL1008	T2
FL1009T1_FL1009N	2	0.48	2	0.48	1.97	0.2444	-4.31681e+06	FL1009	T1
FL1009T2_FL1009N	2	0.11	2	0.11	2	0.2712	-3.9993e+06	FL1009	T2
FL1012T1_FL1012N	1	0.59	2	0.59	2.04	0.1975	-4.61576e+06	FL1012	T1
FL1012T2_FL1012N	2	0.48	2	0.48	2.08	0.1609	-4.62445e+06	FL1012	T2
FL1013T1_FL1013N	2	0.07	2	0.07	2.09	0.1629	-5.89402e+06	FL1013	T1
FL1013T2_FL1013N	2	0.12	2	0.12	2.13	0.1624	-6.16719e+06	FL1013	T2
FL1014T1_FL1014N	2	0.17	2	0.17	2.02	0.237	-3.89103e+06	FL1014	T1
FL1014T2_FL1014N	2	0.28	2	0.28	1.9	0.1356	-4.68947e+06	FL1014	T2
FL1016T1_FL1016N	2	0.08	2	0.08	2.02	0.1811	-3.75736e+06	FL1016	T1
FL1016T2_FL1016N	1	0.27	2	0.27	2.04	0.0807	-4.31121e+06	FL1016	T2
FL1017T1_FL1017N	2	0.3	2	0.3	2.04	0.1811	-4.03007e+06	FL1017	T1
FL1017T2_FL1017N	3	0.43	2	0.43	2.03	0.1446	-4.07137e+06	FL1017	T2
FL1018T1_FL1018N	1	0.07	2	0.07	2.01	0.2359	-4.16867e+06	FL1018	T1
FL1018T2_FL1018N	2	0.01	2	0.01	2	0.1602	-4.12932e+06	FL1018	T2
FL1019T1_FL1019N	2	0.13	2	0.13	2.28	0.1912	-4.38136e+06	FL1019	T1
FL1019T2_FL1019N	2	0.39	2	0.39	2.26	0.1252	-4.34566e+06	FL1019	T2
FL1020T1_FL1020N	3	0.05	2	0.05	2.04	0.1968	-4.24608e+06	FL1020	T1
FL1020T2_FL1020N	2	0.29	2	0.29	2.06	0.2256	-4.27577e+06	FL1020	T2
FL2001T1_FL2001N	2	0.54	2	0.54	2.04	0.2336	-4.83507e+06	FL2001	T1
FL2001T2_FL2001N	2	0.33	2	0.33	2.02	0.1546	-3.43266e+06	FL2001	T2
FL2002T1_FL2002N	2	0.08	2	0.08	2.1	0.2052	-4.47301e+06	FL2002	T1
FL2002T2_FL2002N	2	0.17	2	0.17	2.08	0.2406	-3.65088e+06	FL2002	T2
FL2005T1_FL2005N	2	0.05	2	0.05	1.99	0.2252	-3.29823e+06	FL2005	T1
FL2005T2_FL2005N	1	0	2	0	1.97	0.2719	-3.83266e+06	FL2005	T2
FL2006T1_FL2006N	2	0	2	0	2	0.2218	-3.69057e+06	FL2006	T1
FL2006T2_FL2006N	4	0.18	2	0.18	2	0.2376	-3.61793e+06	FL2006	T2
FL2007T1_FL2007N	4	0.06	2	0.06	2	0.3108	-3.7903e+06	FL2007	T1
FL2007T2_FL2007N	2	0	2	0	2	0.196	-3.79245e+06	FL2007	T2
FL2008T1_FL2008N	2	0.42	2	0.42	2.01	0.2512	-4.18513e+06	FL2008	T1
FL2008T2_FL2008N	3	0	2	0	2	0.176	-3.96174e+06	FL2008	T2
FL3001T1_FL3001N	3	0.59	2	0.59	2.02	0.2325	-4.01251e+06	FL3001	T1
FL3002T1_FL3002N	4	0.27	2	0.27	2.03	0.2154	-3.81167e+06	FL3002	T1
FL3003T1_FL3003N	2	0.29	2	0.29	1.99	0.2219	-4.10097e+06	FL3003	T1
FL3004T1_FL3004N	3	0.53	2	0.53	2.02	0.2168	-3.90313e+06	FL3004	T1
FL3005T1_FL3005N	1	0.4	2	0.4	2.02	0.2375	-3.95319e+06	FL3005	T1
FL3006T1_FL3006N	3	0.35	2	0.35	2.06	0.3204	-3.73406e+06	FL3006	T1
FL3007T1_FL3007N	2	0.26	2	0.26	2	0.2832	-3.64988e+06	FL3007	T1
FL3008T1_FL3008N	2	0.32	2	0.32	2.01	0.2204	-4.8864e+06	FL3008	T1
FL3009T1_FL3009N	1	0.38	2	0.38	2.04	0.138	-4.09019e+06	FL3009	T1
FL3010T1_FL3010N	4	0.42	2	0.42	1.97	0.2792	-3.78165e+06	FL3010	T1
FL3011T1_FL3011N	3	0.02	2	0.02	2.01	0.1998	-3.61979e+06	FL3011	T1
FL3012T1_FL3012N	1	0	2	0	2.01	0.6458	-4.45136e+06	FL3012	T1
FL3013T1_FL3013N	2	0.27	2	0.27	2	0.2813	-3.87949e+06	FL3013	T1
FL3014T1_FL3014N	2	0.3	2	0.3	2.01	0.2066	-3.72155e+06	FL3014	T1
FL3015T1_FL3015N	2	0.5	2	0.5	2	0.2488	-3.56538e+06	FL3015	T1
FL3016T1_FL3016N	1	0.02	2	0.02	2	0.1178	-3.7447e+06	FL3016	T1
FL3017T1_FL3017N	2	0.02	2	0.02	1.99	0.2875	-3.73462e+06	FL3017	T1
FL3018T1_FL3018N	2	0.14	2	0.14	2	0.2195	-4.38619e+06	FL3018	T1
FL3019T1_FL3019N	3	0.05	2	0.05	1.84	0.1805	-3.77946e+06	FL3019	T1
FL3020T1_FL3020N	2	0.03	2	0.03	2.23	0.1633	-3.83296e+06	FL3020	T1
