# Supplementary material for: Histological Transformation and Progression in Follicular Lymphoma: A Clonal Evolution Study
Source: PLOS journal article supplement (doi:10.1371/journal.pmed.1002197), 2016-12-13

Mutation cellular prevalence

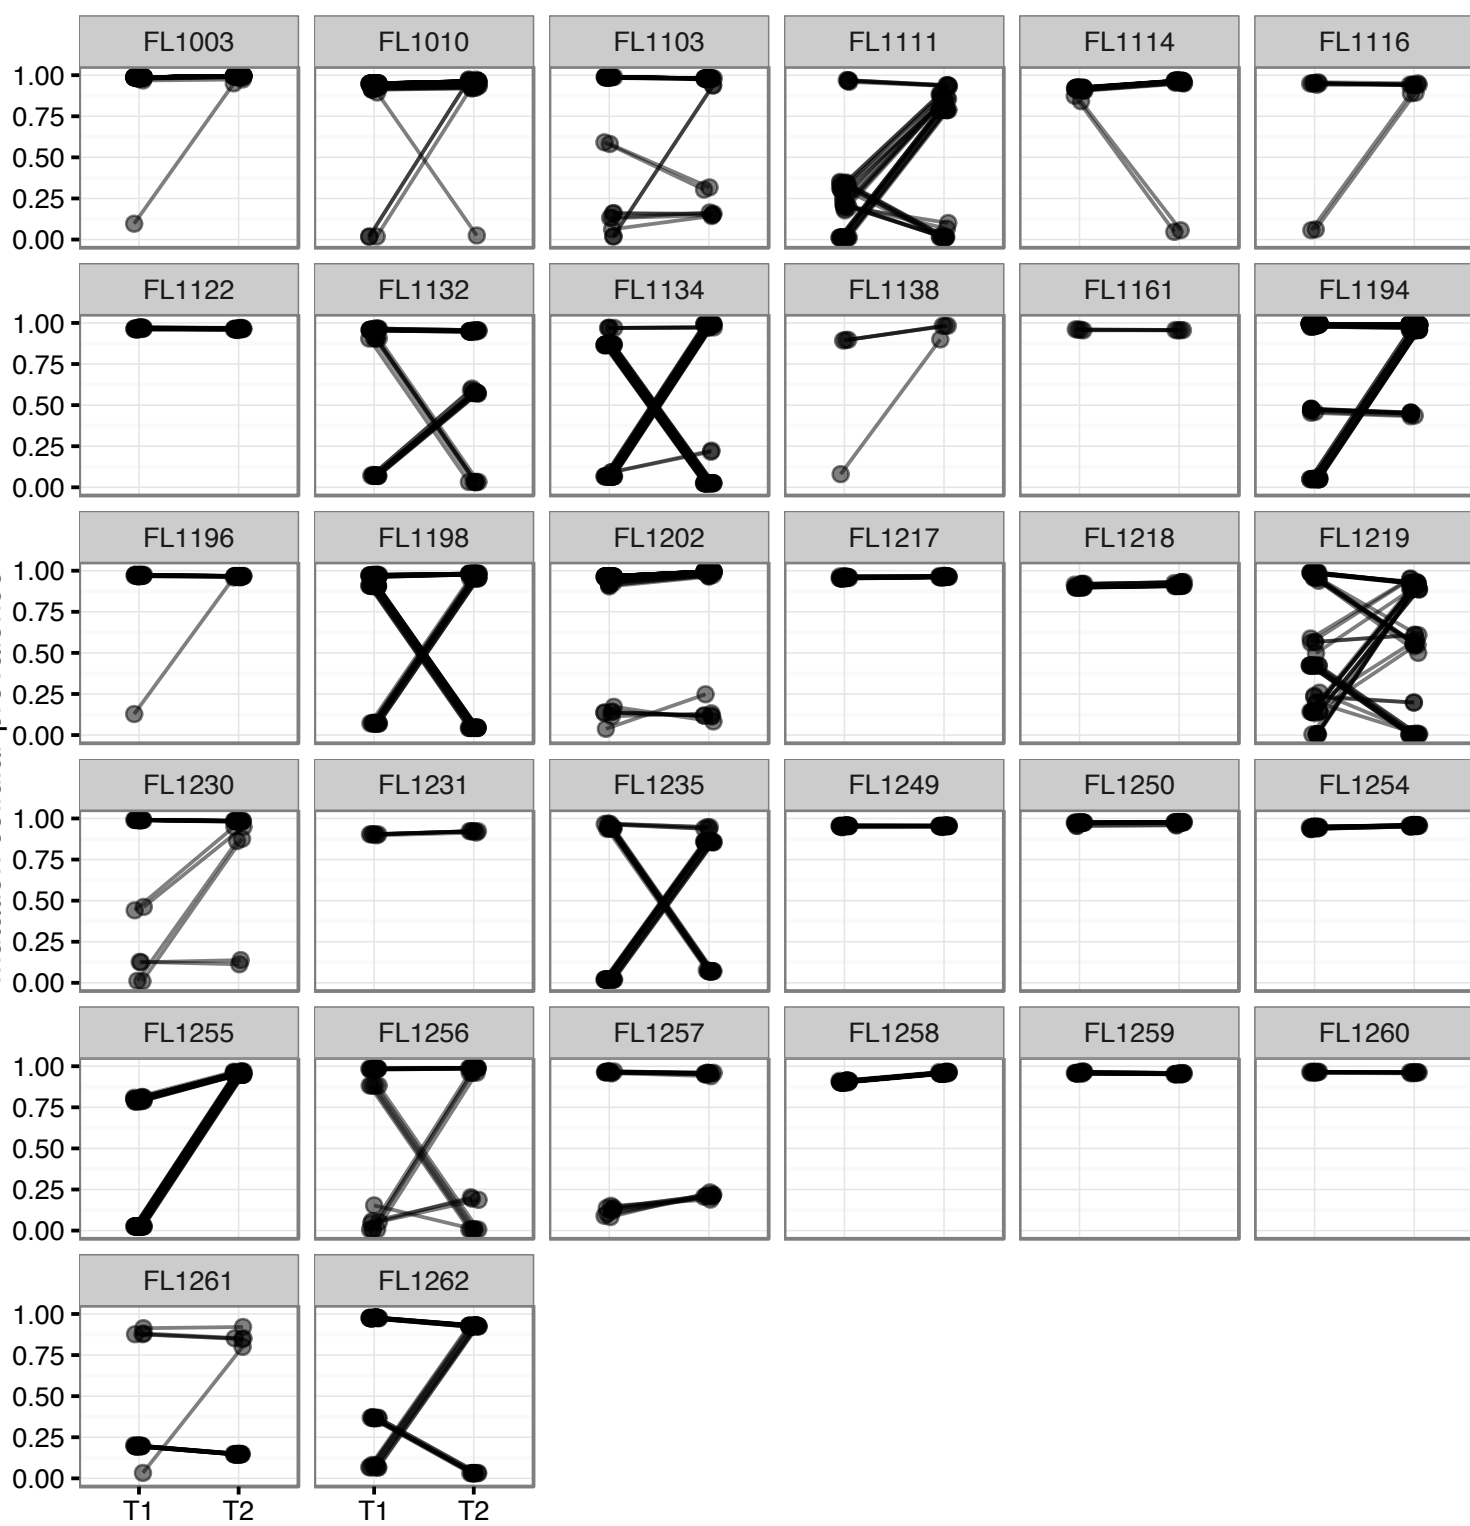

Supplement: S8 (10.1371/journal.pmed.1002197.s008) [file journal.pmed.1002197.s008]
